# Supplementary material for: Effects of Rhizobia Isolated from Coffee Fields in the High Jungle Peruvian Region, Tested on Phaseolus vulgaris L. var. Red Kidney
Source: MDPI journal article supplement (doi:10.3390/microorganisms10040823), 2022-04-15
Supplement: s1 [file s1]

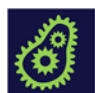

Article

# Effects of Rhizobia Isolated from Coffee Fields in the Peruvian Region on *Phaseolus vulgaris* L. Var. Red Kidney Bean Yield

Jesus Lirio-Paredes, Katty Ogata-Gutiérrez and Doris Elizabeth Zúñiga-Dávila \*

Laboratorio de Ecología Microbiana y Biotecnología, Department of Biology, Faculty of Science, Universidad Nacional Agraria La Molina, Peru; [jesusliriopar@gmail.com](mailto:jesusliriopar@gmail.com) (J.L.-P.); [kogata@lamolina.edu.pe](mailto:kogata@lamolina.edu.pe) (K.O.-G.)

\* Correspondence: [dzuniga@lamolina.edu.pe](mailto:dzuniga@lamolina.edu.pe)

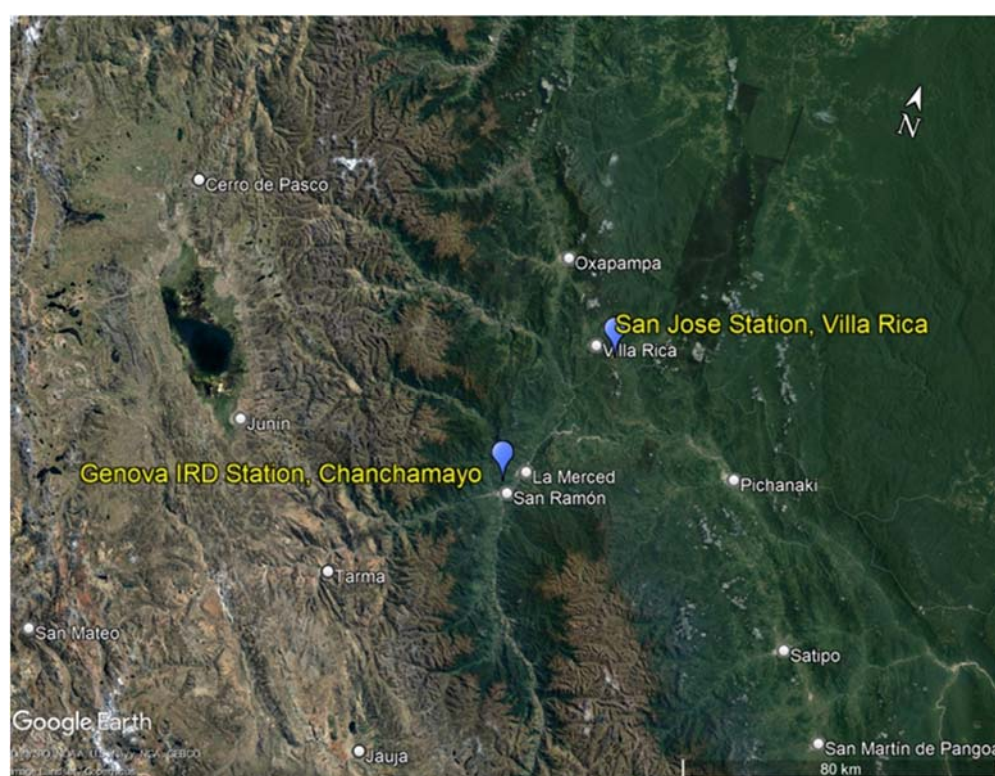

**Figure S1.** Map to locate the two sampling areas.
